# Supplementary material
Source: Elsevier journal article supplement (https://www.sciencedirect.com/science/article/pii/S0300289623001308)
Supplement: mmc1 [file S0300289623001308:mmc1.pdf]

## CARTA CIENTÍFICA

### TÍTULO: MESOTELIOMA: UNA ENFERMEDAD ACTUAL

AUTORES: Josep Tarrés <sup>a</sup>, Carmen Diego Roza <sup>b</sup>, Constança Albertí-Casas <sup>c</sup>

#### AFILIACIÓN:

<sup>a</sup>CAP Canaletes-Fontetes. Plaza Velázquez s/n. 08290 Cerdanyola del Vallès, Barcelona, España

<sup>b</sup>Departamento de Neumología. Hospital Arquitecto Marcide, Avda da Residencia, s/n. 15405 Ferrol, A Coruña, España

<sup>c</sup>Departament de Salut, Subdirecció General d'Avaluacions Mèdiques, Av. de Vallcarca, 169, 08023 Barcelona, España

AUTOR DE CORRESPONDENCIA: Carmen Diego Roza

Servicio de Neumología, Hospital Arquitecto Marcide, Avda da Residencia, s/n. 15405 Ferrol, A Coruña (Spain)

Email: [carmen.diego.roza@sergas.es](mailto:carmen.diego.roza@sergas.es)

#### CONFLICTO DE INTERESES

El presente artículo ha sido elaborado en ausencia de ninguna relación comercial o financiera que pueda suponer un conflicto de interés.

#### FONDOS

El presente estudio no ha recibido ninguna beca ni financiación pública o privada.

#### COMPARTIR DATOS

Los datos estarán disponibles para cualquier petición razonable realizada al autor de correspondencias. Los datos más relevantes del estudio se han incluido en el artículo.

El mesotelioma pleural es una neoplasia que en nuestro medio solo puede ser atribuible a la inhalación de fibras de amianto. Otras patologías que se presentan por exposición al asbesto son las placas pleurales, la asbestosis pulmonar, los derrames pleurales y otras neoplasias. En el caso del mesotelioma, éste tiene actualmente un mal pronóstico por su mala respuesta terapéutica. Presenta dos características específicas, la primera es su modelo de carcinogénesis que es de “dosis- respuesta” sin un nivel mínimo de seguridad de exposición y la segunda consiste en un periodo de latencia muy largo, pudiendo llegar a ser de 40-50 años de promedio.

Existen 3 fuentes bien establecidas de exposición al amianto: laboral, por convivencia con un trabajador expuesto, y, ambiental por residir o trabajar en la proximidad de un foco emisor.

Existen estudios predictivos sobre la posible estabilización de casos de mesotelioma pleural en Europa, aunque la mayoría solo contemplan el sexo masculino y la exposición laboral. Las curvas predicen un aumento sostenido de casos con un pico hacia el año 2020, una fase de meseta o estabilización, y un posterior descenso (1-3).

Hemos realizado un estudio retrospectivo en la comarca del Vallés Occidental Este, en la provincia de Barcelona (Catalunya, España). Dicha comarca comprende 11 municipios que tienen en común compartir el mismo hospital de referencia, el Hospital Universitari Parc Taulí, en Sabadell (4). El número actual de asegurados en el sistema público de salud para estos 11 municipios es de 442.914 habitantes. La primera y mayor fábrica de fibrocemento del estado español, que estuvo en activo durante 90 años, desde 1907 a 1997, se construyó en un terreno situado entre dos de estos municipios (Cerdanyola del Vallès y Ripollet).

El método de identificación de nuevos casos fue una búsqueda activa en la base de datos del e-cap (sistema informatizado de registro y seguimiento clínico del Institut Català de la Salut (ICS), de casos diagnosticados de mesotelioma pleural entre 1975 al 2020 y con confirmación histológica.

En todos los casos se realizó una entrevista posterior con el paciente o un familiar próximo, para completar la información sobre la fuente de exposición.

En el caso frecuente de coexistencia de diversas fuentes de exposición, el criterio de asignación a la fuente principal fue considerar la fuente de mayor intensidad de exposición según el criterio establecido de mayor a menor, es decir laboral, conviviente o ambiental (5).

Desde 1975 a 2020 se diagnosticaron 274 casos de mesotelioma pleural, 143 por exposición laboral, 86 por exposición ambiental y 45 por convivencia con un trabajador expuesto. El porcentaje de los tipos de exposición varía según el quinquenio del diagnóstico, reflejando el tipo predominante de exposición en los años anteriores al diagnóstico. La tendencia global de nuevos casos es claramente ascendente en el

período del estudio. La incidencia acumulada para los años 1996 a 2020 en nuestra zona es de 2,21 casos/100.000 habitantes

Se muestra la figura 1 de la presentación temporal de 274 casos nuevos de mesotelioma pleural diagnosticados en la zona de estudio. Se hace un recuento de los casos totales y según la fuente de exposición principal y la línea de tendencia total para el período. Los recuentos de nuevos casos se presentan agrupados por quinquenios (figura 1).

El registro de la casuística constata un aumento quinquenal del número total de mesoteliomas pleurales desde su inicio en 1975, objetivando una tendencia ascendente de la curva epidemiológica, sin signos de estabilización en el número total.

Separados por las fuentes de exposición principal, observamos que:

-El número de casos de exposición laboral está en fase de meseta desde 1996, aunque van apareciendo ocupaciones más diversificadas en los últimos años. Ello puede deberse a períodos más largos de latencia para exposiciones menos intensas o a un mayor conocimiento del riesgo laboral por parte de los médicos y/o de los trabajadores afectados.

- El número de casos de exposición por convivencia ha entrado en descenso desde 2011, 40 años después de la prohibición en 1977 de llevar la ropa de trabajo a casa para lavar. Dicha ropa solía ser lavada por algún familiar (habitualmente esposas).

Este hallazgo sugiere que las medidas preventivas de exposición tienen efecto en el descenso de casos a largo plazo, debido al largo período de latencia entre la exposición y la enfermedad. Por tanto, las medidas de prevención que adoptemos hoy día tendrán su mayor efecto al cabo de unos años, con un descenso de nuevos casos cuando finalice el período de latencia desde la última exposición.

- El número de casos de exposición ambiental está en aumento desde 1996 y es el responsable de que la totalidad de la casuística siga creciendo desde dicho quinquenio hasta 2020. La causa es la exposición ambiental a polvo de amianto en mal estado, ya sea por cercanía a antiguos focos industriales contaminantes o por inhalación de fibras de amianto procedentes de materiales que contienen amianto (MCA) en viejas construcciones o en derribos o vertederos que contienen restos de amianto degradado.

El número de diagnósticos de mesotelioma pleural sigue en tendencia ascendente en nuestra comarca de estudio, Valles Occidental Est. Nuestros datos demuestran que en los últimos años el mesotelioma y, por ende, toda la patología relacionada con el amianto, aun se debe en buena parte a la exposición laboral. Sin embargo, los nuevos casos que se diagnostican son debidos, cada vez más, a la contaminación ambiental por amianto, constituyendo un grave problema de salud pública.

La problemática actual de exposición al amianto ya no es, únicamente, de tipo laboral, localizada en algunas empresas o actividades profesionales. Esta fue la exposición principal hasta los años 90, afectando principalmente a pacientes que trabajaron en algunos municipios del estado español que acogieron macrofocos de contaminación (fábricas de fibrocemento, astilleros...). Un patrón ocupacional similar se detectó en la

provincia de Barcelona en este período (5). Estudios más recientes en nuestra zona ya detectaron la importancia creciente de la exposición ambiental como causa de mesoteliomas pleurales (6-7). Este tipo de exposición implica mayor porcentaje de mujeres en los nuevos casos, tal como se describe en estudios descriptivos en otros países (8).

Actualmente la exposición ambiental es la principal causa del aumento sostenido en el número de nuevos casos de mesotelioma pleural en nuestra zona y en otras donde persiste la exposición a materiales que contienen amianto en mal estado (9-10).

A pesar de la prohibición de la importación, utilización e instalación de Materiales Conteniendo Amianto (MCA) en el 2002, la incidencia acumulada de mesotelioma pleural sigue creciendo.

Nuestros datos sugieren que la presencia de materiales MCA deteriorados (en domicilios, escuelas, talleres, antiguas fábricas, otro tipo de construcciones, trenes, barcos y vehículos antiguos, vertederos...) es una amenaza para la salud pública y su retirada debería ser una prioridad en las políticas de salud para la población general.

## Bibliografía

(1) Peto J, Decarli A, La Vecchia C, Levi F, Negri E. The European mesothelioma epidemic. *Br J Cancer*. 1999;79:666-672.

<https://www.nature.com/articles/6690105>

Consultado 26 de enero 2023

(2) Hodgson JT, McElvenny DM, Darnton AJ, Price MJ, Peto J. The expected burden of mesothelioma mortality in Great Britain from 2002 to 2050. *Br J Cancer*. 2005;92:587-593.

<https://doi.org/10.1038/sj.bjc.6602307>

Consultado 26 enero 2023

(3) López-Abente G, García-Gómez M, Menéndez-Navarro A, et al. Pleural cancer mortality in Spain: time-trends and updating of predictions up to 2020. *BMC Cancer*. 2013;13:528.

<https://bmccancer.biomedcentral.com/articles/10.1186/1471-2407-13-528>

Consultado 26 enero 2023

(4) Tarrés J, Abós-Herràndiz R, Albertí C, et al. Enfermedad por amianto en una población próxima a una fábrica de fibrocemento. *Arch Bronconeumol*. 2009;45:429-434.

<https://www.archbronconeumol.org/es-enfermedad-por-amianto-una-poblacion-articulo-S0300289609002233>

Consultado 26 enero 2023

(5) Grupo de Estudio del Mesotelioma en Barcelona (GEMEBA). Mortalidad por mesotelioma pleural en la provincia de Barcelona. *Med Clin (Barc)*, 101 (1993), pp. 565-569

<https://www.tdx.cat/bitstream/handle/10803/4597/aat6de6.pdf;jsessionid=4937C95B54CD6C019672BC55DAE169CF?sequence=6>

Consultado 26 de enero de 2023

(6) Tarrés J, Albertí C, Martínez-Artés X, et al. Pleural mesothelioma in relation to meteorological conditions and residential distance from an industrial source of asbestos. *Occup Environ Med*. 2013;70:588-590.

<https://oem.bmj.com/content/70/8/588.long>

Consultado 26 enero 2023

(7) Tarrés J, Albertí-Casas C, Rosell-Murphy M, Canela-Soler J, Abós-Herrándiz R, Orriols R. Malignant asbestos-related disease in a population exposed to asbestos. *Am J Ind Med*. 2020;1–7.

<https://onlinelibrary.wiley.com/doi/epdf/10.1002/ajim.23141>

Consultado 26 de enero 2023

(8) Marinaccio A, Corfiati M, Binazzi A, et al. *Occup Environ Med* 2018;75:254–262.

<https://oem.bmj.com/content/oemed/75/4/254.full.pdf>

Consultado 26 de enero 2023

(9) Ferrante D, Mirabelli D, Tunesi S, et al. Pleural mesothelioma and occupational and non-occupational asbestos exposure: a case-control study with quantitative risk assessment. *Occup Environ Med*. 2016;73:147–53.

<https://oem.bmj.com/content/73/3/147.long>

Consultado 26 de enero 2023

(10) Xu, R., Barg, F.K., Emmett, E.A. *et al.* Association between mesothelioma and non-occupational asbestos exposure: systematic review and meta-analysis. *Environ Health* 17, 90 (2018).

<https://doi.org/10.1186/s12940-018-0431-9>

Consultado 26 de enero 2023

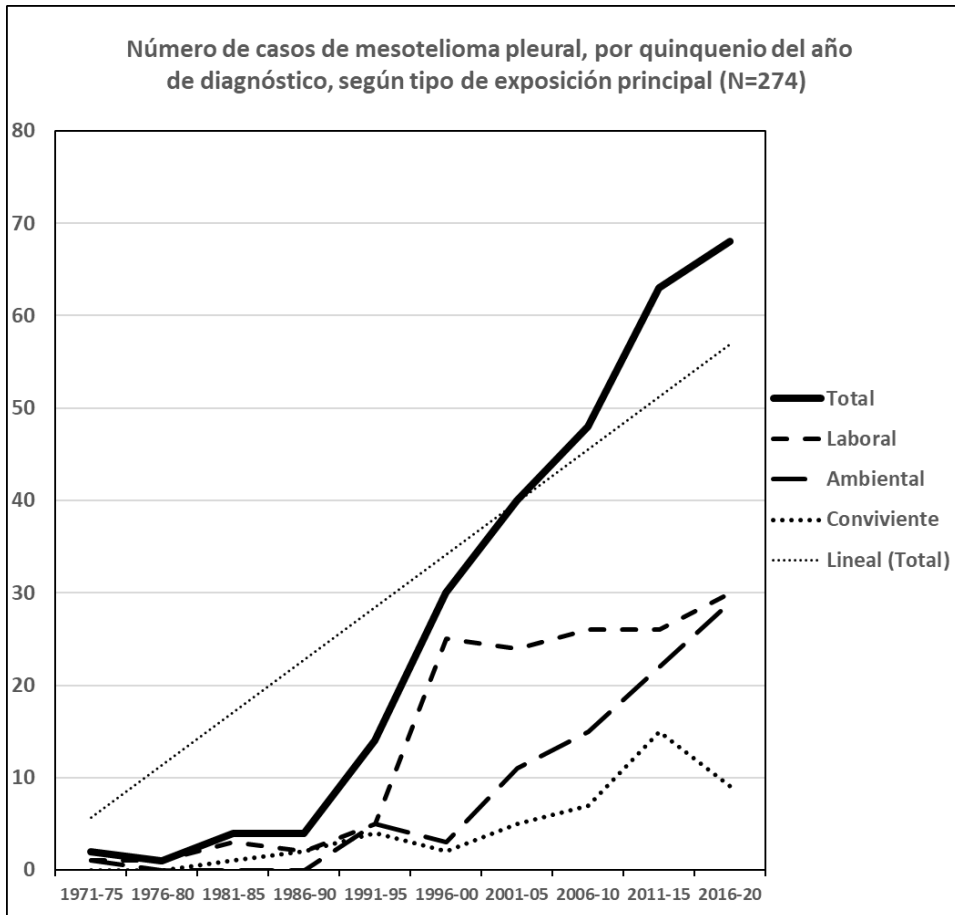

Figura 1. Número de nuevos casos de mesotelioma pleural en la comarca del Vallès occidental este, por quinquenio del año de diagnóstico, total y según tipo de exposición principal al amianto.
